# Supplementary material for: Involvement of the Wbp pathway in the biosynthesis of Porphyromonas gingivalis lipopolysaccharide with anionic polysaccharide
Source: PubMed Central journal article supplement (PMC4031482; doi:10.1038/srep05056), 2014-05-23
Supplement: srep05056-s1.pdf [file srep05056-s1.pdf]

**Supplementary Information for:**

**Involvement of the Wbp pathway in the biosynthesis of *Porphyromonas gingivalis*  
lipopolysaccharide with anionic polysaccharide**

Mikio Shoji<sup>1</sup>, Keiko Sato<sup>1</sup>, Hideharu Yukitake<sup>1</sup>, Mariko Naito<sup>1</sup> and Koji Nakayama<sup>1</sup>

<sup>1</sup> Division of Microbiology and Oral Infection, Department of Molecular Microbiology and Immunology, Nagasaki University Graduate School of Biomedical Sciences, Nagasaki, 852-8588, Japan

Correspondence and requests for materials should be addressed to M. S.

([m-shoji@nagasaki-u.ac.jp](mailto:m-shoji@nagasaki-u.ac.jp))

**Supplemental Figure 1 | Comparison of amino acid sequences among WbpB homologs.**

*Porphyromonas gingivalis* ATCC 33277: PGN\_0168, *Pseudomonas aeruginosa* PAO1: PA3158, *Helicobacter pylori* NCTC 11637: HP0679 and *Bordetella pertussis* Tohama I: BP0093 were compared. The alignment was created using the ClustalW and Boxshade programs hosted at the Swiss EMBnet web site. The red triangle indicates the nonsense mutation in *P. gingivalis* strain HG66.

**Supplemental Figure 2 | Comparison of amino acid sequences among WbpA homologs.**

*Porphyromonas gingivalis* ATCC 33277: PGN\_0613, PGN\_1243, *Pseudomonas aeruginosa* PAO1: PA3159 and *Bordetella pertussis* Tohama I: BP1629, BP3150 were compared. The alignment was created using the ClustalW and Boxshade programs hosted at the Swiss EMBnet web site.

**Supplemental Figure 3 | Comparison of amino acid sequences among WbpE homologs.**

*Porphyromonas gingivalis* ATCC 33277: PGN\_1236, *Pseudomonas aeruginosa* PAO1: PA3155 and *Bordetella pertussis* Tohama I: BP0091 were compared. The alignment was created using the ClustalW and Boxshade programs hosted at the Swiss EMBnet web site. The red triangle indicates the essential residue for WbpE activity.

**Supplemental Figure 4 | Comparison of amino acid sequences among WbpD homologs.**

*Porphyromonas gingivalis* ATCC 33277: PGN\_0002, *Pseudomonas aeruginosa* PAO1: PA3156 and *Bordetella pertussis* Tohama I: BP0092 were compared. The alignment was created using the ClustalW and Boxshade programs hosted at the Swiss EMBnet web site. The red triangles indicate the essential residue for WbpD activity.

**Supplemental Table 1 | Strains used in this study.**

**Supplemental Table 2| Plasmids used in this study.**

**Supplemental Table 3| Primers used in this study.**

## Supplemental Text 1| Construction of *P. gingivalis* mutant strains.

### Construction of *P. gingivalis* mutants

To create *P. gingivalis* PGN\_0168 (*wbpB*::Em<sup>r</sup> (KDP220) and PGN\_0002::Em<sup>r</sup> (KDP222) mutants, the upstream regions were amplified with PGN\_0168upFw/PGN\_0168upRev and PGN\_0002upFw/PGN\_0002upRev primers, respectively, using *P. gingivalis* ATCC 33277 as the template, and cloned into the pCR4 vector or pGEM-T Easy vector. Each upstream and downstream region was swapped with the appropriate restriction region of pKD740<sup>26</sup>, generating pKD892 and pKD893. The resulting targeting vectors pKD892 and pKD893 were linearized with SacI and introduced into *P. gingivalis* ATCC 33277 by electroporation followed by selection on blood agar plates containing Em (10 µg/ ml).

To create a *P. gingivalis* PGN\_1236 (*porR*::Tc<sup>r</sup> (KDP221) mutant, the upstream region was amplified with PGN\_1236upFw/PGN\_1236upRev primers using *P. gingivalis* ATCC 33277 as the template and cloned into the pCR4 vector, yielding pCR4-porRup. The downstream region was amplified with PGN\_1236dwFw/PGN\_1236dwRev primers using *P. gingivalis* ATCC 33277 as the template and cloned into the pCR4 vector, yielding pCR4-porRdw1. To eliminate the EcoRI site that was closest to the NotI site in pCR4-porRdw1, pCR4-porRdw1 was digested with NotI and was then self-ligated, yielding pCR4-porRdw2. The EcoRI-BamHI region of pCR4-porRup was inserted into the same region of pCR4-porRdw2, yielding pCR4-porRupdw2. The *tetQ* gene, which is the BamHI-BglIII region of pKD375<sup>51</sup>, was inserted into the BamHI site of pCR4-porRupdw2, generating pKD894. The resulting targeting vector pKD894, linearized with NotI, was introduced into *P. gingivalis* ATCC 33277 by electroporation and was then selected on blood agar plates containing Tc (0.7 µg/ ml).

## Construction of *P. gingivalis* complemented strains

The promoter region of the *Porphyromonas gulae* catalase gene (accession no. AB083039 in GenBank/EMBL/DDBJ databases) was amplified using p6-34-F-KpnI/p6-34-R-SalI from pKD955<sup>6</sup> and was cloned into the pCR4 vector to yield pCR4-cat pro. A KpnI-EcoRI DNA fragment containing the promoter region of the *Porphyromonas gulae* catalase gene of pCR4-cat pro was swapped into the same region of pKD854<sup>5</sup> to yield pBSSK-cat pro-rgpBter.

To create complementation plasmids for the *wbpB* (PGN\_0168) and PGN\_0002 genes, *P. gingivalis* ATCC 33277 was used as the template for amplification with PGN\_0168compFw/PGN\_0168compRev or PGN\_0002compFw/PGN\_0002compRev primers, respectively. Each PCR product was cloned into pUC118, yielding pUC118-*wbpB* and pUC118-PGN\_0002.

To create a complementation plasmid with the *wbpD* gene from *Pseudomonas aeruginosa*, the coding region of *wbpD* was amplified from *P. aeruginosa* using the *P. a. wbpDFw*/*P. a. wbpDRev* primers. The PCR product was cloned into pUC118, yielding pUC118-*P.a. wbpD*.

The SalI-XbaI DNA fragment containing the coding region of the *wbpB*, PGN\_0002 and *P.a. wbpD* genes from pUC118-*wbpB*, pUC118-PGN\_0002 and pUC118-*P. a. wbpD* was inserted into the same region of pBSSK-cat pro-rgpBter to yield pBSSK-cat pro-*wbpB*-rgpBter, pBSSK-cat pro-PGN\_0002-rgpBter and pBSSK-cat pro-*P.a. wbpD*-rgpBter. The KpnI-NotI DNA fragment of pBSSK-cat pro-*wbpB*-rgpBter, pBSSK-cat pro-PGN\_0002-rgpBter and pBSSK-cat pro-*P.a. wbpD*-rgpBter was inserted into the same region of a pTCB vector<sup>52</sup> to yield pTCB-*wbpB*, pTCB-PGN\_0002 and pTCB-*P.a. wbpD*. The pTCB vector containing *wbpB*, PGN\_0002 or *P. a. wbpD* was introduced into *Escherichia coli* S17-1<sup>53</sup> by electroporation and was then selected on LB agar plates containing Ap (100 µg/ml). The

transformant was mated with strain HG66 or the PGN\_0002 mutant (KDP222) and was then selected on blood agar plates containing Gm (50 µg/ ml) and Tc (0.7 µg /ml), yielding HG66/pWbpB+, PGN\_0002/pPGN\_0002+ (KDP223) and PGN\_0002/p*P. a.*WbpD+ (KDP224).

**Supplemental Text 2| Sequence comparison of the *wbpB* gene in *P. gingivalis* strains.**

|                  | 10      | 20         | 30    | 40     | 50        |        |        |        |        |        |      |
|------------------|---------|------------|-------|--------|-----------|--------|--------|--------|--------|--------|------|
| <b>W83</b>       | ATGCACA | ACT TTGCC  | ATCAT | CGGTGT | GGCC GGCT | TATTG  | CTCCGC | GCCA   |        |        |      |
| <b>TDC60</b>     | ATGCACA | ACT TTGCC  | ATCAT | CGGTGT | GGCC GGCT | TATTG  | CTCCGC | GCCA   |        |        |      |
| <b>HG66</b>      | ATGCACA | ACT TTGCC  | ATCAT | CGGTGT | GGCC GGCT | TATTG  | CTCCGC | GCCA   |        |        |      |
| <b>33277</b>     | ATGCACA | ACT TTGCC  | ATCAT | CGGTGT | GGCC GGCT | TATTG  | CTCCGC | GCCA   |        |        |      |
| <b>Consensus</b> | *****   | *****      | ***** | *****  | *****     | *****  | *****  | *****  |        |        |      |
|                  | 60      | 70         | 80    | 90     | 100       |        |        |        |        |        |      |
| <b>W83</b>       | CCTTCGC | CC ATCAA   | GGATA | CAGGCA | AACCG     | CTTGGT | ATCG   | GCTATG | GATA   |        |      |
| <b>TDC60</b>     | CCTTCGC | CC ATCAA   | AGATA | CAGGCA | AATCG     | CTTGGT | ATCG   | GCTATG | GATA   |        |      |
| <b>HG66</b>      | CCTTCGC | CC ATCAA   | GGATA | CAGGCA | AACCG     | CTTGGT | ATCG   | GCTATG | GATA   |        |      |
| <b>33277</b>     | CCTTCGC | CC ATCAA   | GGATA | CAGGCA | AACCG     | CTTGGT | ATCG   | GCTATG | GATA   |        |      |
| <b>Consensus</b> | *****   | *****      | ****  | *****  | **        | *****  | *****  | *****  | *****  |        |      |
|                  | 110     | 120        | 130   | 140    | 150       |        |        |        |        |        |      |
| <b>W83</b>       | AGTTCG  | ACAG TGTGG | TATC  | ATGGAC | AGTT      | ACTTCC | CGAA   | AGCTGC | CCTTC  |        |      |
| <b>TDC60</b>     | AGTTCG  | ACAG TGTGG | TATC  | ATGGAC | AGTT      | ACTTCC | CGAA   | AGCTGC | CCTTC  |        |      |
| <b>HG66</b>      | AGTTCG  | ACAG TGTGG | TATC  | ATGGAC | AGTT      | ACTTCC | CGAA   | AGCTGC | CCTTC  |        |      |
| <b>33277</b>     | AGTTCG  | ACAG TGTGG | TATC  | ATGGAC | AGTT      | ACTTCC | CGAA   | AGCTGC | CCTTC  |        |      |
| <b>Consensus</b> | *****   | *****      | ***** | *****  | *****     | *****  | *****  | *****  | *****  |        |      |
|                  | 160     | 170        | 180   | 190    | 200       |        |        |        |        |        |      |
| <b>W83</b>       | TTTACG  | GAGC       | AAGAA | CTGTT  | CGACCG    | TCAC   | AACTCC | AAGC   | TACGAG | GAAC   |      |
| <b>TDC60</b>     | TTTACG  | GAGC       | AAGAA | CTGTT  | CGACCG    | TCAC   | AACTCC | AAGC   | TACGAG | GAAC   |      |
| <b>HG66</b>      | TTTACG  | GAGC       | AAGAA | CTGTT  | CGA       | TCGTC  | AC     | AACTCC | AAGC   | TACGAG | GAAC |
| <b>33277</b>     | TTTACG  | GAGC       | AAGAA | CTGTT  | CGA       | TCGTC  | AC     | AACTCC | AAGC   | TACGAG | GAAC |
| <b>Consensus</b> | *****   | *****      | ***   | *****  | *****     | *****  | *****  | *****  | *****  | *****  |      |
|                  | 210     | 220        | 230   | 240    | 250       |        |        |        |        |        |      |
| <b>W83</b>       | CGATCAG | GCT ATCG   | ACCAC | CG     | TGTCCG    | TTTG   | TACACC | GAAC   | TATCTG | CACG   |      |
| <b>TDC60</b>     | CGATCAG | GCT ATCG   | ACCAT | G      | TGTCCG    | TTTG   | TACACC | GAAC   | TATCTG | CACG   |      |
| <b>HG66</b>      | CGATCAG | GCT ATCG   | ACCAC | CG     | TGTCCG    | TTTG   | TACACC | GAAC   | TATCTG | CACG   |      |
| <b>33277</b>     | CGATCAG | GCT ATCG   | ACCAC | CG     | TGTCCG    | TTTG   | TACACC | GAAC   | TATCTG | CACG   |      |
| <b>Consensus</b> | *****   | *****      | *     | *****  | *****     | *****  | *****  | *****  | *****  | *****  |      |

|                  |            |            |            |            |            |
|------------------|------------|------------|------------|------------|------------|
|                  | 260        | 270        | 280        | 290        | 300        |
| <b>W83</b>       | ATGCTCATTG | TCGCTATGGC | CTCGACTTG  | GAGCGGATGT | GATATGCGAG |
| <b>TDC60</b>     | ATGCTCATTG | TCGCTATGGC | CTACGACTTG | GAGCGGATGT | GATATGCGAG |
| <b>HG66</b>      | ATGCTCATTG | TCGCTATGGC | CTCGACTTG  | GAGCGGATGT | GATATGCGAG |
| <b>33277</b>     | ATGCTCATTG | TCGCTATGGC | CTCGACTTG  | GAGCGGATGT | GATATGCGAG |
| <b>Consensus</b> | *****      | *****      | ** *****   | *****      | *****      |
|                  | 310        | 320        | 330        | 340        | 350        |
| <b>W83</b>       | AAGCCTTTGG | TGCTCAATCC | TTGGAATATA | GACGCTTTGC | AGGAGATCGA |
| <b>TDC60</b>     | AAGCCTTTGG | TGCTCAATCC | TTGGAATATA | GACGCTTTGC | AGGAGATCGA |
| <b>HG66</b>      | AAGCCTTTGG | TGCTCAATCC | TTGGAATATA | GACGCTTTGC | AGGAGATCGA |
| <b>33277</b>     | AAGCCTTTGG | TGCTCAATCC | TTGGAATATA | GACGCTTTGC | AGGAGATCGA |
| <b>Consensus</b> | *****      | *****      | *****      | *****      | *****      |
|                  | 360        | 370        | 380        | 390        | 400        |
| <b>W83</b>       | GCGAGAGACG | GGGCATCGGA | TCTATAATAT | TCTTCAACTG | CGACTCCATG |
| <b>TDC60</b>     | GCAAGAGACG | GGGCATCGGA | TCTATAATAT | TCTTCAACTG | CGACTCCATG |
| <b>HG66</b>      | GCAAGAGACG | GGGCATCGGA | TCTATAATAT | TCTTCAACTG | CGACTCCATG |
| <b>33277</b>     | GCAAGAGACG | GGGCATCGGA | TCTATAATAT | TCTTCAACTG | CGACTCCATG |
| <b>Consensus</b> | ** *****   | *****      | *****      | *****      | *****      |
|                  | 410        | 420        | 430        | 440        | 450        |
| <b>W83</b>       | AGTCGATCGT | GGCCCTGAAG | AGAAAGATCG | AATCCGGATC | GGCCGACAAG |
| <b>TDC60</b>     | AGTCATCGT  | GGCCCTGAAG | AGAAAGATCG | AATCCGGACC | GGCCGACAAG |
| <b>HG66</b>      | AGTCATCGT  | GGCCCTGAAG | AGAAAGATCG | AATCCGGACC | GGCCGACAAG |
| <b>33277</b>     | AGTCATCGT  | GGCCCTGAAG | AGAAAGATCG | AATCCGGACC | GGCCGACAAG |
| <b>Consensus</b> | **** ***** | *****      | *****      | *****      | * *****    |
|                  | 460        | 470        | 480        | 490        | 500        |
| <b>W83</b>       | ATCTATGATG | TCACGCTTAC | ATATATTACT | TCGCGGGCA  | ATTGGTACTA |
| <b>TDC60</b>     | ATCTATGATG | TCACGCTGAC | GTATATTACT | TCGCGGGCA  | ATTGGTACTA |
| <b>HG66</b>      | ATCTATGATG | TCACGCTGAC | GTATATTACT | TCGCGTGGCA | ACTGGTACTA |
| <b>33277</b>     | ATCTATGATG | TCACGCTGAC | GTATATTACT | TCGCGTGGCA | ACTGGTACTA |
| <b>Consensus</b> | *****      | *****      | ** *****   | *****      | *****      |
|                  | 510        | 520        | 530        | 540        | 550        |
| <b>W83</b>       | TACGAGCTGG | AAGGGAGACG | AGCGTAAGAG | CGGTGGCATA | GCTACGAACA |
| <b>TDC60</b>     | TACGAGCTGG | AAGGGAGACG | AGCGTAAGAG | CGGTGGCATA | GCTACGAACA |
| <b>HG66</b>      | TACGAGCTGG | AAGGGAGACG | AGCGTAAGAG | CGGCGGTATA | GCAACGAATA |
| <b>33277</b>     | TACGAGCTGG | AAGGGAGACG | AGCGTAAGAG | CGGCGGTATA | GCAACGAATA |
| <b>Consensus</b> | *****      | *****      | *****      | *** ** *   | *** ** *   |



|                  | 560        | 570        | 580        | 590        | 600        |
|------------------|------------|------------|------------|------------|------------|
| <b>W83</b>       | TCGGTGTTCA | TTTCTACGAC | ATGCTGTCAT | GGATTTTCGG | CAGTGACGA  |
| <b>TDC60</b>     | TCGGTGTTCA | TTTCTACGAC | ATGCTGTCAT | GGATTTTCGG | CAGTGACGA  |
| <b>HG66</b>      | TCGGTGTTCA | TTTCTACGAC | ATGCTGTCAT | GGATTTTCGG | CAGTGACGA  |
| <b>33277</b>     | TCGGTGTTCA | TTTCTACGAC | ATGCTGTCAT | GGATTTTCGG | CAGTGACGA  |
| <b>Consensus</b> | ***** **   | *****      | ***** *    | *****      | ***** **   |
|                  | 610        | 620        | 630        | 640        | 650        |
| <b>W83</b>       | CACAATGTCG | TACATGTGTG | TGTGCATGAC | AGGGCTGCCG | GCTATTTGGA |
| <b>TDC60</b>     | CACAATGTCG | TACATGTGTG | TGTGCATGAC | AGGGCTGCCG | GCTATTTGGA |
| <b>HG66</b>      | CACAATGTCG | TACATGTGTG | TGTGCATGAC | AGGGCTGCCG | GCTATTTGGA |
| <b>33277</b>     | CACAATGTCG | TACATGTGTG | TGTGCATGAC | AGGGCTGCCG | GCTATTTGGA |
| <b>Consensus</b> | *****      | *****      | ** *****   | *****      | ***** **   |
|                  | 660        | 670        | 680        | 690        | 700        |
| <b>W83</b>       | ATTGGAGCGC | GCCCGTGTGC | GTTACTTCCT | TTCGATCAAT | GAGGAGCTTC |
| <b>TDC60</b>     | ATTGGAGCGC | GCCCGTGTGC | GTTACTTCCT | TTCGATCAAT | GAGGAGCTTC |
| <b>HG66</b>      | ATTGGAGCGC | GCCCGTGTGC | GTTACTTCCT | TTCGATCAAT | GAGGAGCTTC |
| <b>33277</b>     | ATTGGAGCGC | GCCCGTGTGC | GTTACTTCCT | TTCGATCAAT | GAGGAGCTTC |
| <b>Consensus</b> | *****      | *****      | *****      | *****      | ** *****   |
|                  | 710        | 720        | 730        | 740        | 750        |
| <b>W83</b>       | TGCCCGAGAA | TGCCGTACAG | GGAGAGAAGC | GAACCTTTCG | TACGATAGAA |
| <b>TDC60</b>     | TGCCCGAGAA | TGCCGTACAG | GGAGAGAAGC | GAACCTTTCG | TACGATAGAA |
| <b>HG66</b>      | TGCCCGAGAA | TGCCGTACAG | GGAGAGAAGC | GAACCTTTCG | TACGATAGAA |
| <b>33277</b>     | TGCCCGAGAA | TGCCGTACAG | GGAGAGAAGC | GAACCTTTCG | TACGATAGAA |
| <b>Consensus</b> | *****      | *****      | ** *****   | *****      | *****      |
|                  | 760        | 770        | 780        | 790        | 800        |
| <b>W83</b>       | ATCGACGGCG | AATCATTCGA | GTTCAGTGAA | GGGTTTACGG | AGCTGCACAC |
| <b>TDC60</b>     | ATCGACGGCG | AATCATTCGA | GTTCAGTGAA | GGGTTTACGG | AGCTGCACAC |
| <b>HG66</b>      | ATCGACGGCG | AATCATTCGA | GTTCAGTGAA | GGGTTTACGG | AGCTGCACAC |
| <b>33277</b>     | ATCGACGGCG | AATCATTCGA | GTTCAGTGAA | GGGTTTACGG | AGCTGCACAC |
| <b>Consensus</b> | *****      | *****      | *****      | *****      | *****_     |
|                  | 810        | 820        | 830        | 840        | 850        |
| <b>W83</b>       | CGAGAGTTAT | CGGCCGATTT | TGGCCGGTGA | AGGTTTCGGT | TTGGACGAAG |
| <b>TDC60</b>     | CGAGAGTTAT | CGGCCGATTT | TGGCCGGTGA | AGGTTTCGGT | TTGGACGAAG |
| <b>HG66</b>      | CGAGAGTTAT | CGGCCGATTT | TGGCCGGTGA | AGGTTTCGGT | TTGGACGAAG |
| <b>33277</b>     | CGAGAGTTAT | CGGCCGATTT | TGGCCGGTGA | AGGTTTCGGT | TTGGACGAAG |
| <b>Consensus</b> | *****      | *****      | *****      | *****      | *****      |

|                  |            |            |             |            |            |            |
|------------------|------------|------------|-------------|------------|------------|------------|
|                  | 860        | 870        | 880         | 890        | 900        |            |
| <b>W83</b>       | CTCGCAACAG | CATTCAGATC | GTTTCATGACA | TTCGCAATGC | TTCTCCCGTA |            |
| <b>TDC60</b>     | CTCGCAACAG | CATTCAGATC | GTTTCATGACA | TTCGCAATGC | TTCTCCCGTA |            |
| <b>HG66</b>      | CTCGCAACAG | CATTCAGATC | GTTTCATGACA | TTCGCAATGC | TTCTCCCGTA |            |
| <b>33277</b>     | CTCGCAACAG | CATTCAGATC | GTTTCATGACA | TTCGCAATGC | TTCTCCCGTA |            |
| <b>Consensus</b> | *****      | *****      | *****       | *****      | *****      |            |
|                  | 910        | 920        | 930         | 940        | 950        |            |
| <b>W83</b>       | GGA        | CTGAAGG    | GCGAATACCA  | CCCCCTTGCA | CGTTTGCCCC | TGGCCTCTCA |
| <b>TDC60</b>     | GGA        | CTGAAGG    | GCGAATACCA  | CCCCCTTGCA | CGTTTGCCCC | TGGCCTCTCA |
| <b>HG66</b>      | GGA        | CTGAAGG    | GCGAATACCA  | CCCCCTTGCA | CGTTTGCCCC | TGGCCTCTCA |
| <b>33277</b>     | GGA        | CTGAAGG    | GCGAATACCA  | CCCCCTTGCA | CGTTTGCCCC | TGGCCTCTCA |
| <b>Consensus</b> | *****      | *****      | ****        | *****      | *****      | *****      |
|                  | 960        | 970        |             |            |            |            |
| <b>W83</b>       | TCCTTT     | CGGA       | TGGAGACGCT  | GA         |            |            |
| <b>TDC60</b>     | TCCTTT     | CGGA       | TGGAGACGCT  | GA         |            |            |
| <b>HG66</b>      | TCCTTT     | CGGA       | TGGAGACGCT  | GA         |            |            |
| <b>33277</b>     | TCCTTT     | CGGA       | TGGAGACGCT  | GA         |            |            |
| <b>Consensus</b> | *****      | *****      | **          |            |            |            |

Yellow color indicates the same residues between HG66 and other strains.

Red color indicates the HG66 nonsense mutation.

### Supplement Text 3| Abbreviations

GlcNAc, glucosamine; GlcNAcA, 2-acetamido-2,3-dideoxy-D-glucuronic acid;  
3-keto-D-GlcNAcA, 2-acetamido-2-deoxy-D-ribo-hex-3-uluronic acid; GlcNAc3NA,  
2-acetamido-3-amino-2,3-dideoxy-D-glucuronic acid; GlcNAc3NAcA,  
2,3-diacetamido-2,3-dideoxy-D-glucuronic acid; ManNAc3NAcA,  
2,3-diacetamido-2,3-dideoxy-D-mannuronic acid. AcCoA, acetyl-coenzyme A; CoA,  
coenzyme A; 2-HG, 2-hydroxyglutarate;  $\alpha$ -KG,  $\alpha$ -ketoglutarate; NAD<sup>+</sup>, nicotinamide adenine  
dinucleotide; NADH, nicotinamide adenine dinucleotide hydrate; PLP, pyridoxal 5'-phosphate;  
PMP, pyridoxamine 5'phosphate.



# Supplemental Figure 2

BP1629 1 -----  
 BP3150 1 -----  
 PGN\_0613 1 -----  
 PA WbpA 1 -----  
 PGN\_1243 1 **MGQACIGSRPISFLWEVRTCRRFIGSYTLIRRVIVSHVLSGSRHYIPATGRGNSRSLSLDK**

BP1629 1 -----MPKKFSNPADVHL**AVVGLGYVGLPLAVEFGKK**-**RPVIGFDINERRIAALKAG**  
 BP3150 1 -----MRIDDVKL**AVVGLGYVGLPLAVEFGKK**-**RPVIGFDINERRIAALKAG**  
 PGN\_0613 1 -MKPYKALTIINTKEMNNIR**IAIIGLGYVGLPLARLFSTK**-**FPTIGFDINPNRVEELISG**  
 PA WbpA 1 ---MIDVNTVVEKFKSRQAL**IGIVGLGYVGLPLMLRYNAIGFDVLCGIDIDDVKVDKLNAG**  
 PGN\_1243 61 **ASPFYLTFFPKNSISYYNMDIAVVGIGYVGLVSAATCF**FAELGANVRCIDTDRNKIEQLNSG****  
 Consensus .....\*.....\*

BP1629 52 **HDHTEVEVDELARAAQLS---YTAER--EELGKANVFIVTVPTPIDEYKOPDLTPLVKA**  
 BP3150 47 **HDHTEVEVDELARAAQLS---YTAER--EELGKANVFIVTVPTPIDEYKOPDLTPLVKA**  
 PGN\_0613 59 **YDSTGEIGNELLOEALQKG---LLCTTKIEEIRDCNFYIVTVPTPIDHNTPLDRPLAA**  
 PA WbpA 58 **QCYIEHIPQAKTAKARASG---FEATDFSRVSECDA**LILCVPTPLNKYREPDM**SVFINT**  
 PGN\_1243 121 **TIPYEPGLEKMIARNVKA**GRLRFGTEIEQAVPEADII**FI**AVGTPAGE**DGSADMSYV**LD****  
 Consensus .....\*.....\*

BP1629 107 **SETIGAVLKRGDIVIYESTVYPGATEEDCVPVLERVSGLK**ENODFYAGYS**PERINPGDKA**  
 BP3150 102 **SETIGAVLKRGDIVIYESTVYPGATEEDCVPVLERVSGLK**ENODFYAGYS**PERINPGDKA**  
 PGN\_0613 116 **SETIGKVIDQGDVVVYESTVYPGVTEDECIPIIEK**VSGLKYNVDFEAGYS**PERINPGDKV**  
 PA WbpA 115 **TDALKPYLRVCGVVSLESTY**PGTTEELL**PRVQEG-GLVVGRDIYLVV**SPERED**PGNP**  
 PGN\_1243 181 **ARSIGRAMSRVILIVTKSTV**PVGSYRLIRKAIQ**EELDKREVLID**EDIA**SN**PEFL**KEGN**AI****  
 Consensus .....\*.....\*

BP1629 167 **HRVNTIKKVTSGS-TPEVAELVDQLYN-EIITAGTHKASSIRVAEAAKV**IENTORDV**NIA**  
 BP3150 162 **HRVNTIKKVTSGS-TPEVAELVDQLYN-EIITAGTHKASSIRVAEAAKV**IENTORDV**NIA**  
 PGN\_0613 176 **YTVENIKKVTSGS-TPEIADYVDRMYN-TVLVNGTHKASSIRVAEASKI**IENAORDV**NIA**  
 PA WbpA 174 **FETRTIPKVI**GCHTPQC**LEV**GIALYEQA**IDR-VVPV**SSTKAAEMTKL**ENI**HRAV**NI**G****  
 PGN\_1243 241 **DDFMKPD**RVVV**GVDSDRARELITSLYK**PMLLNN**FRVLFMD**IASAEMTKYAN**AML**ATRI**S**  
 Consensus .....\*.....\*

BP1629 225 **LINELALIFNKMGIDTEAVLQ**AAGTKWN**--FLPFRPG-LVGGHCIGVD**PYYLTHKAQA**IG**  
 BP3150 220 **LINELALIFNKMGIDTEAVLQ**AAGTKWN**--FLPFRPG-LVGGHCIGVD**PYYLTHKAQA**IG**  
 PGN\_0613 224 **FMNEIAKIFNAMEIDTREVLEAAATKWN--FLPFOPG-LVGGHCIGVD**PYYLQRAQ**VY**G****  
 PA WbpA 231 **LVNEMKIVADRMGIDIFEVVDAAATK**PF**G-FT**PY**Y**PG**PLGGHCIPID**PFY**L**ITW**KAREY**G****  
 PGN\_1243 301 **FMNDV**ANL**CER**VGAD**VS**MVRLGIG**SDSRIGSKFLY**PGCGY**GGSC**FPKDV**KAL**IRTAED**NG**  
 Consensus .....\*.....\*

BP1629 282 **YHPEIILAGRR**LNDS**MGYVVSOLVK**AMAKRRIH**VEGARVLL**MGLTFK**ENC**PDLRNTR**RVV**  
 BP3150 277 **YHPEIILAGRR**LNDS**MGYVVSOLVK**AMAKRRIH**VEGARVLL**MGLTFK**ENC**PDLRNTR**RVV**  
 PGN\_0613 291 **VYPRV**LMSARR**LNDSMG**SYLASOTIK**Q**MN**KAGIM**VKDAR**LL**L**G**TFK**ENC**PD**IR**NTK**VI**  
 PA WbpA 290 **L**TRF**IEAKGGV**NQAM**PEY**VLG**KLMD**GLNEA**GRAL**K**SRV**LV**L**GI**AY**KK**N**V**LD**DM**RES**PSV****  
 PGN\_1243 361 **YRMEVLEAVERVNEKQKSILFDKFSTY**YKGN**--V**Q**RCV**AIW**GL**S**FK**PG**T**DD**M**REAP**SL**  
 Consensus .....\*.....\*

BP1629 342 **DIVRELGEYHVDV**DVYDP**WVD**PAAEA**HE**YGI**TP**VAK**PA**AGA**---Y**DAI**ILAV**SH**HQ**FVE****  
 BP3150 337 **DIVRELGEYHVDV**DVYDP**WVD**PAAEA**HE**YGI**TP**VAK**PA**AGA**---Y**DAI**ILAV**SH**HQ**FVE****  
 PGN\_0613 351 **DTYST**LQ**EYTKNI**IV**HDP**WAN**PSIA**EQ**Y**G**IKI**HNE**FP**KGK**---F**DAI**ILAV**SH**HQ**FVE**SN**  
 PA WbpA 350 **E**IM**ELIEAKGG**MVAYS**DP**H**VP**V**FP**KMR**EH**HF**EL**S**E**PL**TAEN**LAR**FD**AV**V**L**AT**D**ED**K**FD**Y****  
 PGN\_1243 418 **V**L**IEK**L**LE**V**GC**R**VR**V**Y**D**EV**AM**KEA**Q**K**R**L**G**DK**V**E**Y**TT**D**MY**D**AV**R**G-**A**E**AL**PH**V**TE**W**KE**ER**M**  
 Consensus .....\*.....\*

BP1629 398 **MGAEAIRK**FGKAEH**ILYDLKYV**L**APE**QAD**LRL-----** 429  
 BP3150 393 **MGAEAIRK**FGKAEH**ILYDLKYV**L**APE**QAD**LRL-----** 424  
 PGN\_0613 407 **IDLEKS--STANTIIY**D**V**K**GIL**P**Q**G**K**Y**HK**L**-----** 435  
 PA WbpA 410 **ELIK**AE**AKLV**VDS**R**G**K**Y**R**S**PA**A**HI**I**KA-----** 436  
 PGN\_1243 477 **PDWS**ALS**Q**AMA**AS**L**VID**G**R**N**V**Y**EL**P**AD**S**D**FT**LL**N**IG**NSA**IES**AS**SK-----** 522  
 Consensus .....\*.....\*



# Supplemental Figure 3

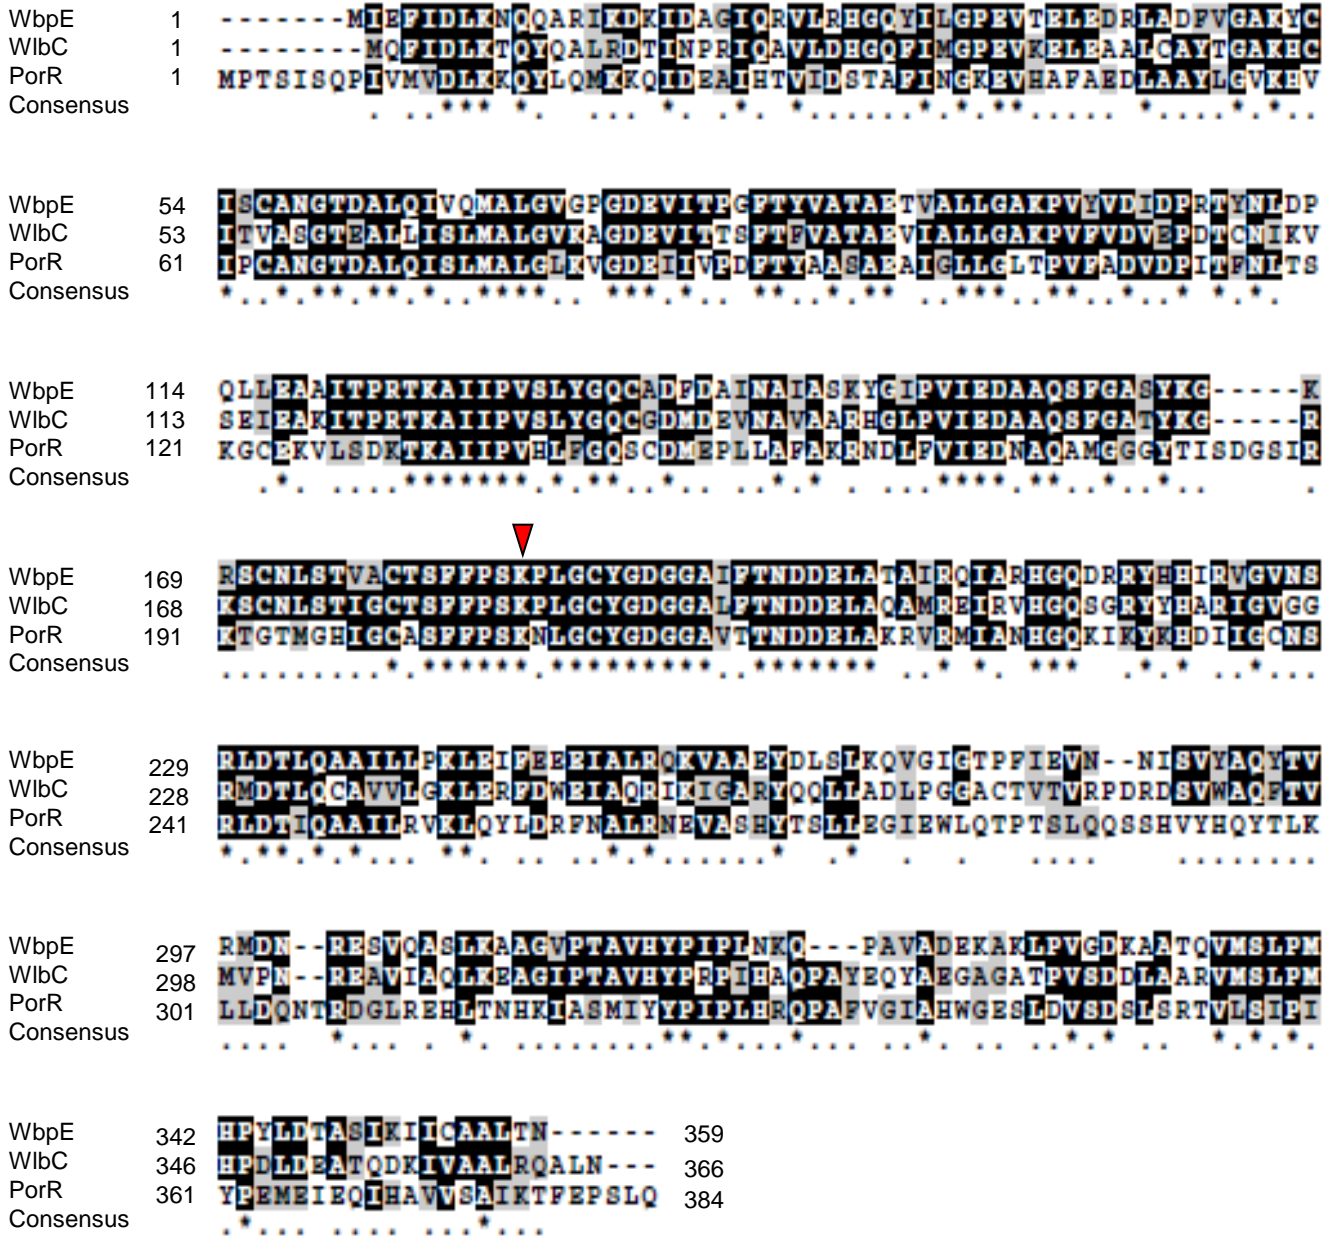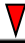



Supplemental Table 1. Bacterial strains used in this study.

| <i>P. gingivalis</i> strain | Description                    | Source or reference                 |
|-----------------------------|--------------------------------|-------------------------------------|
| 33277                       | Wild type                      | ATCC                                |
| HG66                        | Naturally non-pigmented strain | Gift from J. Potempa <sup>a</sup>   |
| HG66/pWbpB+                 | HG66/pTCB-wbpB                 | This study                          |
| KDP220                      | <i>wbpB</i> ::Em <sup>f</sup>  | This study                          |
| KDP221                      | <i>porR</i> :Tc <sup>f</sup>   | This study                          |
| KDP222                      | PGN_0002::Em <sup>f</sup>      | This study                          |
| KDP223                      | KDP222/pTCB-PGN_0002           | This study                          |
| KDP224                      | KDP222/pTCB-P. a. wbpD         | This study                          |
| Pugd1                       | <i>ugdA</i> ::Em <sup>f</sup>  | Sato et al. 2009                    |
| W83                         | Wild type                      | Gift from M. J. Duncan <sup>b</sup> |

  

| <i>E. coli</i> strain | Description                                                  | Source or reference |
|-----------------------|--------------------------------------------------------------|---------------------|
| S17-1                 | RP-4-2-Tc::Mu <i>aph</i> ::Tn7 <i>recA</i> , Sm <sup>f</sup> | Simon et al. 1983   |
| XL-1 Blue             | General purpose host strain for cloning                      | Stratagene          |

  

| <i>P. aeruginosa</i> strain | Description | Source or reference              |
|-----------------------------|-------------|----------------------------------|
| PAO1                        | Wild-type   | Gift from J. S. Lam <sup>c</sup> |



a Department of Molecular Genetics, The Forsyth Institute, Boston, MA.

b Faculty of Biochemistry Biophysics and Biotechnology, Jagiellonian University, Krakow, Poland.

c Department of Molecular and Cellular Biology, University of Guelph, Ontario, Canada.

Supplemental Table 2. Plasmids used in this study.

| Plasmid                          | Description                                                                                | Source or reference |
|----------------------------------|--------------------------------------------------------------------------------------------|---------------------|
| pBluescript II SK(-)             | Ap <sup>r</sup> , cloning vector                                                           | Stratagene          |
| pBSSK-cat pro-rgpBter            | Ap <sup>r</sup> , pBSSK-cat pro-rgpBter                                                    | This study          |
| pBSSK-cat pro-wbpB-rgpBter       | Ap <sup>r</sup> , pBSSK-cat pro-wbpB-rgpBter                                               | This study          |
| pBSSK-cat pro-PGN_0002-rgpBter   | Ap <sup>r</sup> , pBSSK-cat pro-PGN_0002-rgpBter                                           | This study          |
| pBSSK-cat pro-P. a. wbpD-rgpBter | Ap <sup>r</sup> , pBSSK-cat pro-P. a. wbpD-rgpBter                                         | This study          |
| pCR4                             | Ap <sup>r</sup> Km <sup>r</sup> , PCR Topo cloning vector                                  | Invitrogen          |
| pCR4-cat pro                     | Ap <sup>r</sup> Km <sup>r</sup> , pCR4-cat pro                                             | This study          |
| pCR4-porRup                      | Ap <sup>r</sup> Km <sup>r</sup> , pCR4-porRup                                              | This study          |
| pCR4-porRdw1                     | Ap <sup>r</sup> Km <sup>r</sup> , pCR4-porRdw1                                             | This study          |
| pCR4-porRdw2                     | Ap <sup>r</sup> Km <sup>r</sup> , pCR4-porRdw2 (NotI self-ligated of pCR4-porRdw1)         | This study          |
| pCR4-porRupdw2                   | Ap <sup>r</sup> Km <sup>r</sup> , pCR4-porRup-porRdw2                                      | This study          |
| pGEM-T Easy                      | Ap <sup>r</sup> , PCR cloning vector                                                       | Promega             |
| pKD375                           | Ap <sup>r</sup> , Tc <sup>r</sup> , pUC19- <i>tetQ</i>                                     | Shi et al. 1999     |
| pKD740                           | Ap <sup>r</sup> Em <sup>r</sup> , pGEM-T Easy-hbp35up- <i>ermF</i> -hbp35dw                | Shoji et al. 2010   |
| pKD854                           | Ap <sup>r</sup> , pBSSK-sKGP-rgpBter                                                       | Sato et al. 2005    |
| pKD892                           | Ap <sup>r</sup> Em <sup>r</sup> , pGEM-T Easy-PGN_0168up- <i>ermF</i> -PGN_0168dw          | This study          |
| pKD893                           | Ap <sup>r</sup> Em <sup>r</sup> , pGEM-T Easy-PGN_0002up- <i>ermF</i> -PGN_0002dw          | This study          |
| pKD894                           | Ap <sup>r</sup> Km <sup>r</sup> Tc <sup>r</sup> , pCR4-PGN_1236up- <i>tetQ</i> -PGN_1236dw | This study          |
| pKD955                           | Ap <sup>r</sup> , pBSSK-p-porK+-T                                                          | Sato et al. 2010    |
| pTCB                             | Ap <sup>r</sup> Tc <sup>r</sup> , shuttle vector plasmid                                   | Nagano et al. 2007  |

|                          |                                                                                    |            |
|--------------------------|------------------------------------------------------------------------------------|------------|
| pTCB- <i>wbpB</i>        | Ap <sup>r</sup> Tc <sup>r</sup> , pTCB-PGN_0168                                    | This study |
| pTCB-PGN_0002            | Apr Tc <sup>r</sup> , pTCB-PGN_0002                                                | This study |
| pTCB- <i>P. a. wbpD</i>  | Ap <sup>r</sup> Tc <sup>r</sup> , pTCB- <i>wbpD</i> from <i>P. aeruginosa</i> PAO1 | This study |
| pUC118                   | Ap <sup>r</sup> , PCR cloning vector                                               | Takara     |
| pUC118- <i>wbpB</i>      | Ap <sup>r</sup> , pUC118-PGN_0168                                                  | This study |
| pUC118-PGN_0002          | Ap <sup>r</sup> , pUC118-PGN_0002                                                  | This study |
| pUC118- <i>P.a. wbpD</i> | Ap <sup>r</sup> , pUC118- <i>wbpD</i> from <i>P. aeruginosa</i> PAO1               | This study |

---

Supplemental Table 3. Primers used in this study.

| Primer name              | Nucleotide sequence (5'-3')                        | underline | double underline |
|--------------------------|----------------------------------------------------|-----------|------------------|
| p6-34-F-KpnI             | <u>GGTACCTTCGTCGTC</u> CAATCAGCATCCCAG             | KpnI      |                  |
| p6-34-R-SalI             | <u>GTCGACTGTTTTGTCTCTT</u> ATTTAAGTTA              | SalI      |                  |
| PGN_0002upFw             | <u>GCATGCTCCAGCAGCGT</u> ACGCTTCAAAGC              | SphI      |                  |
| PGN_0002upRev            | <u>GGATCCAAAGACCTGCT</u> ATCAATTGGCGA              | BamHI     |                  |
| PGN_0002dwFw             | <u>CTGCAGTCTACACCAA</u> ATAGCGGCATATC              | PstI      |                  |
| PGN_0002dwRev            | <u>GAGCTCCGATTACATA</u> CTCGGTTACAACC              | SacI      |                  |
| PGN_0168upFw             | <u>GCATGCATGCACAAC</u> TTTGCCATCATCGG              | SphI      |                  |
| PGN_0168upRev            | <u>GGATCCCTCGCATAT</u> CACATCCGCTCCAA              | BamHI     |                  |
| PGN_0168dwFw             | <u>CTGCAGAAAGGAAT</u> TTCTATAATCTTATC              | PstI      |                  |
| PGN_0168dwRev            | <u>GAGCTCCGCTGTGC</u> ACCGATGTCGGACAC              | SacI      |                  |
| PGN_1236upFw             | <u>GGTACCGTGAACGAT</u> AGCGAAGGGAAAGCA             | KpnI      |                  |
| PGN_1236upRev            | <u>GGATCCAGGCGTGT</u> TGTAGGGATTTCTGGT             | BamHI     |                  |
| PGN_1236dwFw             | <u>GGATCCCAAAGAG</u> GAGGGAGGCTCGTCTA              | BamHI     |                  |
| PGN_1236dwRev            | <u>GCGGCCGC</u> CAGATTATTGCCCAGACCTTGA             | NotI      |                  |
| PGN_0168compFw           | <u>GTCGACATG</u> CACAACTTTGCCATCATCGGT             | SalI      | Start codon      |
| PGN_0168compRev          | <u>TCTAGATTAG</u> CGTCTCCATCCGAAAGGATG             | XbaI      | Stop codon       |
| PGN_0002compFw           | <u>GTCGACATG</u> ATCCATCCCACAGCGATAGTA             | SalI      | Start codon      |
| PGN_0002compRev          | <u>TCTAGATTAG</u> TCCGATACCGGTTCTATTGT             | XbaI      | Stop codon       |
| <i>P.a. wbpD</i> compFw  | <u>GTCGACATG</u> AGTTATTATCAGCACCCCAGCGCGATCGTGGAC | SalI      | Start codon      |
| <i>P.a. wbpD</i> compRev | <u>TCTAGATTAC</u> ACGTCCACCTTGCTCAGGAT             | XbaI      | Stop codon       |
